# Supplementary material for: mRNA and miRNA expression profile reveals the role of miR-31 overexpression in neural stem cell
Source: PubMed Central journal article supplement (PMC7568549; doi:10.1038/s41598-020-74541-8), 2020-10-16
Supplement: 41598_2020_74541_MOESM1_ESM.pdf [file 41598_2020_74541_MOESM1_ESM.pdf]

mRNA and miRNA Expression Profile Reveals the Role of miR-31 Overexpression  
in Neural Stem Cell

Pengfei Li<sup>1,3</sup>, Yuantao Gao<sup>2</sup>, Xiao Li<sup>3</sup>, Feng Tian<sup>3</sup>, Fei Wang<sup>3</sup>, Yali Wang<sup>3</sup>, Bichun  
Zhao<sup>3</sup>, Ruxin Zhang<sup>3</sup>, Chunfang Wang<sup>3\*</sup>

1. Translational Medicine Research Center, Shanxi Medical University, Xinjian South Road 56,  
Taiyuan, 030001, Shanxi, People's Republic of China. sxmulpf@sxmu.edu.cn
2. Nanchang University, Nanchang 330000, China
3. Laboratory Animal Center, Shanxi Medical University, Xinjian South Road 56, Shanxi 030001,  
People's Republic of China

\* Corresponding author. wangchunfang@sxmu.edu.cn

Table S1 Specific Forward and Reverse Oligonucleotide Primers Used for q-PCR Validation

| Gene   | Primer         |                         |
|--------|----------------|-------------------------|
| Ecell1 | Forward Primer | CTGGCGCTCAAATACCTGGG    |
|        | Reverse Primer | GCGAACGAGTAGAAGTCCTGG   |
| Pkd2l1 | Forward Primer | TACAGCGACCCTCCTTCCC     |
|        | Reverse Primer | CCTCTGATGCTCCGACAGATATG |
| Syt17  | Forward Primer | GTCAGAGGTGCTATGAGTCCA   |
|        | Reverse Primer | GGGGTCAAAGGAACATCGCT    |
| Bsn    | Forward Primer | GGAACAGCTTGACAGTGCAG    |
|        | Reverse Primer | GGACGCCGTTTCTGGTCTT     |
| Mag    | Forward Primer | CTGCCGCTGTTTTGGATAATGA  |
|        | Reverse Primer | CATCGGGGAAGTCGAAACGG    |
| En2    | Forward Primer | ACTGCACGCGCTATTCTG      |
|        | Reverse Primer | ACCTGTTGGTCTGAAACTCAG   |
| Actb   | Forward Primer | AATCGTGCGTGACATCAAAG    |
|        | Reverse Primer | AAGGAAGGCTGGAAAAGAGC    |

Table S2 The MicroRNA Assays Used for q-PCR Validation

| miRNA           | Assay ID (Thermo Fisher) |
|-----------------|--------------------------|
| mmu-miR-31-5p   | 000185                   |
| mmu-miR-106b-5p | 000442                   |
| mmu-miR-130a-3p | 000454                   |
| mmu-miR-135a-5p | 000460                   |
| mmu-let-7d-5p   | 002283                   |
| mmu-let-7a-5p   | 000377                   |
| mmu-miR-221-5p  | 464489_mat               |
| U6              | 001973                   |

Table S3 The Differentially Expressed mRNAs in the miR-31 Overexpression Group Compared with Control Group

| ID                 | gene symbol | FDR         | log2FC       | regulated |
|--------------------|-------------|-------------|--------------|-----------|
| ENSMUSG00000001864 | Aif1l       | 6.11E-15    | 1.111771525  | up        |
| ENSMUSG00000026247 | Ecel1       | 1.39E-05    | 1.122647955  | up        |
| ENSMUSG00000037578 | Pkd2l1      | 0.000185611 | 1.087336415  | up        |
| ENSMUSG00000044083 | Efcab8      | 1.09E-05    | 1.470037817  | up        |
| ENSMUSG00000050195 | Scd4        | 0.000149391 | 1.372345899  | up        |
| ENSMUSG00000058420 | Syt17       | 0.005379485 | 1.470153928  | up        |
| ENSMUSG00000064220 | Hist2h2aa2  | 0.000143465 | 1.015684527  | up        |
| ENSMUSG00000066878 | Gm10184     | 0.000514424 | 4.40662989   | up        |
| Mouse_newGene_1157 |             | 0.001273748 | 1.094317873  | up        |
| Mouse_newGene_1823 |             | 0.005765096 | 1.021452923  | up        |
| Mouse_newGene_1830 |             | 0           | 2.095696295  | up        |
| Mouse_newGene_2228 |             | 0           | 6.495983747  | up        |
| Mouse_newGene_861  |             | 1.39E-12    | 1.424551558  | up        |
| ENSMUSG00000009487 | Otog        | 0.000155254 | -2.138862034 | down      |
| ENSMUSG00000020010 | Vnn3        | 0.000259711 | -2.493341786 | down      |
| ENSMUSG00000022491 | Glycam1     | 7.29E-12    | -1.00124495  | down      |
| ENSMUSG00000030222 | Rerg        | 2.91E-05    | -1.173646218 | down      |
| ENSMUSG00000031450 | Grk1        | 0.002058483 | -1.192255735 | down      |
| ENSMUSG00000031906 | Smpd3       | 0           | -1.768817434 | down      |
| ENSMUSG00000032589 | Bsn         | 8.44E-06    | -1.362676829 | down      |
| ENSMUSG00000036634 | Mag         | 0           | -1.116324017 | down      |
| ENSMUSG00000037754 | Ppp1r16b    | 0           | -1.239808731 | down      |
| ENSMUSG00000037996 | Slc24a2     | 0           | -1.269237924 | down      |
| ENSMUSG00000039095 | En2         | 0.00449843  | -1.048815128 | down      |
| ENSMUSG00000046623 | Gjb4        | 0.009854119 | -3.089812219 | down      |
| ENSMUSG00000047109 | Cldn14      | 0.006577204 | -1.418900597 | down      |
| ENSMUSG00000051000 | Fam160a1    | 0.001033936 | -1.031188064 | down      |
| ENSMUSG00000052135 | Foxo6       | 0.008535573 | -1.066454691 | down      |
| ENSMUSG00000055415 | Atp10b      | 2.66E-05    | -2.12099228  | down      |
| ENSMUSG00000067276 | Capn6       | 4.48E-12    | -1.010036871 | down      |
| ENSMUSG00000079507 | H2-Q1       | 0           | -6.57186422  | down      |
| Mouse_newGene_1145 |             | 1.90E-05    | -1.353731753 | down      |
| Mouse_newGene_1852 |             | 0.001886957 | -1.033415344 | down      |
| Mouse_newGene_1858 |             | 0.007856949 | -4.154562916 | down      |
| Mouse_newGene_362  |             | 0.000488433 | -1.745726762 | down      |

Table S4 The Differentially Expressed miRNAs in the miR-31 Overexpression Group Compared with Control Group

| ID                       | FDR         | log2FC      | regulated |
|--------------------------|-------------|-------------|-----------|
| unconservative_4_517095  | 0           | 29.67329677 | up        |
| unconservative_17_331075 | 0           | 27.81433999 | up        |
| unconservative_10_85637  | 0           | 25.78576375 | up        |
| mmu-miR-669b-3p          | 1.31E-05    | 25.04880646 | up        |
| mmu-miR-20b-5p           | 0.001469277 | 24.31181316 | up        |
| unconservative_8_722210  | 0.001469277 | 24.31181316 | up        |
| unconservative_12_166966 | 0.003101294 | 24.1418795  | up        |
| mmu-miR-31-5p            | 0           | 5.481680359 | up        |
| mmu-miR-466g             | 5.39E-05    | 4.305769463 | up        |
| mmu-miR-491-5p           | 0           | 3.890727634 | up        |
| unconservative_10_77518  | 0.001917784 | 3.765183369 | up        |
| mmu-miR-6418-3p          | 0.003701579 | 3.627674177 | up        |
| mmu-let-7g-3p            | 0           | 3.528156317 | up        |
| mmu-miR-466i-3p          | 0.006981324 | 3.475664156 | up        |
| mmu-miR-466q             | 0.006981324 | 3.475664156 | up        |
| mmu-miR-130b-3p          | 0           | 3.305769463 | up        |
| mmu-miR-8114             | 0.00026575  | 3.305769463 | up        |
| mmu-miR-350-3p           | 0           | 3.240267762 | up        |
| mmu-miR-135a-5p          | 0           | 3.198250805 | up        |
| unconservative_5_596467  | 0           | 3.09584029  | up        |
| unconservative_5_596468  | 0           | 3.09584029  | up        |
| mmu-miR-101b-3p          | 0           | 3.091401245 | up        |
| mmu-miR-376b-3p          | 8.86E-06    | 2.949614741 | up        |
| mmu-miR-210-5p           | 0           | 2.946402702 | up        |
| mmu-miR-877-5p           | 0           | 2.930257168 | up        |
| mmu-miR-3102-3p          | 0           | 2.883424987 | up        |
| mmu-miR-8112             | 3.37E-05    | 2.82931617  | up        |
| mmu-miR-324-5p           | 0           | 2.816713371 | up        |
| mmu-miR-297a-3p          | 0           | 2.750548738 | up        |
| mmu-miR-297b-3p          | 0           | 2.750548738 | up        |
| mmu-miR-297c-3p          | 0           | 2.750548738 | up        |
| mmu-miR-17-3p            | 0           | 2.728977591 | up        |
| mmu-miR-154-5p           | 0           | 2.720806962 | up        |
| mmu-miR-5113             | 0.000877637 | 2.720806962 | up        |
| mmu-miR-136-5p           | 0           | 2.705699659 | up        |
| unconservative_7_654738  | 0.000123127 | 2.698096163 | up        |
| mmu-miR-133b-3p          | 0.001609264 | 2.62769496  | up        |
| mmu-miR-193b-3p          | 0           | 2.559999489 | up        |
| mmu-miR-574-3p           | 0           | 2.491728727 | up        |
| mmu-miR-500-3p           | 0           | 2.491633867 | up        |
| mmu-miR-378b             | 0           | 2.470825549 | up        |

|                          |             |             |    |
|--------------------------|-------------|-------------|----|
| mmu-miR-135b-5p          | 0.004965089 | 2.421237687 | up |
| unconservative_14_230657 | 0.004965089 | 2.421237687 | up |
| mmu-miR-190a-5p          | 0           | 2.405302538 | up |
| unconservative_12_150502 | 0.000343677 | 2.376168068 | up |
| mmu-miR-299a-5p          | 0           | 2.331299769 | up |
| mmu-miR-671-5p           | 0           | 2.305752144 | up |
| mmu-miR-466d-3p          | 1.72E-05    | 2.259964516 | up |
| mmu-miR-18a-5p           | 0           | 2.244345816 | up |
| mmu-miR-324-3p           | 0           | 2.2386497   | up |
| mmu-miR-132-3p           | 0           | 2.219886625 | up |
| mmu-miR-196b-3p          | 0.003876226 | 2.21265746  | up |
| mmu-miR-34c-3p           | 0           | 2.182270885 | up |
| mmu-miR-30b-5p           | 0           | 2.161642536 | up |
| unconservative_X_804847  | 0.000218259 | 2.142259819 | up |
| mmu-miR-495-3p           | 0           | 2.100179361 | up |
| mmu-miR-345-5p           | 0           | 2.068503248 | up |
| mmu-miR-425-5p           | 0           | 2.004585048 | up |
| mmu-miR-187-3p           | 0           | 1.96567804  | up |
| mmu-miR-365-3p           | 0           | 1.961164457 | up |
| mmu-miR-188-5p           | 0           | 1.943193816 | up |
| mmu-miR-547-3p           | 0           | 1.922439129 | up |
| mmu-miR-151-5p           | 0           | 1.905735172 | up |
| mmu-miR-532-3p           | 0           | 1.898982506 | up |
| mmu-miR-186-3p           | 0.003727358 | 1.890736293 | up |
| mmu-miR-214-3p           | 0           | 1.890717798 | up |
| mmu-miR-374b-5p          | 0           | 1.875635802 | up |
| mmu-miR-669a-3p          | 0           | 1.863741303 | up |
| mmu-miR-669o-3p          | 0           | 1.863741303 | up |
| mmu-miR-467d-3p          | 0           | 1.844927017 | up |
| mmu-miR-467a-3p          | 0           | 1.829329724 | up |
| mmu-miR-376b-5p          | 0.002809863 | 1.820350429 | up |
| mmu-miR-1249-3p          | 0           | 1.807108675 | up |
| mmu-miR-664-3p           | 0.000207713 | 1.800532897 | up |
| mmu-miR-19b-3p           | 0           | 1.783677987 | up |
| mmu-miR-877-3p           | 4.53E-06    | 1.77970221  | up |
| mmu-miR-29a-5p           | 4.53E-06    | 1.772894644 | up |
| mmu-miR-29b-3p           | 0           | 1.768262163 | up |
| unconservative_7_653856  | 0           | 1.765194705 | up |
| mmu-miR-212-3p           | 0           | 1.728977591 | up |
| mmu-miR-21a-3p           | 0           | 1.72077906  | up |
| mmu-miR-3093-3p          | 0           | 1.72077906  | up |
| mmu-miR-16-5p            | 0           | 1.717503892 | up |
| mmu-miR-326-3p           | 0           | 1.680651009 | up |
| mmu-miR-3099-3p          | 0           | 1.675002015 | up |

---

|                  |             |             |    |
|------------------|-------------|-------------|----|
| mmu-miR-153-3p   | 0           | 1.661913273 | up |
| mmu-miR-376c-3p  | 0.002456392 | 1.659391169 | up |
| mmu-miR-378a-5p  | 0           | 1.656661913 | up |
| mmu-miR-467d-5p  | 0.000856518 | 1.653687199 | up |
| mmu-miR-106b-5p  | 0           | 1.650944764 | up |
| mmu-miR-700-5p   | 0           | 1.648897781 | up |
| mmu-miR-129-1-3p | 0           | 1.645386433 | up |
| mmu-miR-29c-5p   | 0           | 1.638337925 | up |
| mmu-miR-129-2-3p | 0           | 1.610886515 | up |
| mmu-miR-126a-5p  | 0.000465919 | 1.605329744 | up |
| mmu-miR-365-1-5p | 0.000465919 | 1.605329744 | up |
| mmu-miR-15a-5p   | 0           | 1.605310053 | up |
| mmu-miR-196b-5p  | 0           | 1.600506349 | up |
| mmu-miR-124-3p   | 0.000346371 | 1.585879674 | up |
| mmu-miR-34b-3p   | 0           | 1.573617887 | up |
| mmu-miR-466b-3p  | 0           | 1.568799539 | up |
| mmu-miR-466c-3p  | 0           | 1.568799539 | up |
| mmu-miR-466p-3p  | 0           | 1.568799539 | up |
| mmu-miR-574-5p   | 0           | 1.568785857 | up |
| mmu-miR-708-5p   | 0           | 1.567925669 | up |
| mmu-miR-190b-5p  | 0.005710763 | 1.528171162 | up |
| mmu-miR-670-3p   | 0.000215034 | 1.503699848 | up |
| mmu-miR-223-3p   | 0           | 1.502786684 | up |
| mmu-miR-31-3p    | 0           | 1.496896114 | up |
| mmu-miR-466a-3p  | 0           | 1.495590285 | up |
| mmu-miR-466e-3p  | 0           | 1.495590285 | up |
| mmu-miR-652-3p   | 0           | 1.490760106 | up |
| mmu-miR-669l-5p  | 0.003133053 | 1.490183123 | up |
| mmu-miR-342-3p   | 0           | 1.487810689 | up |
| mmu-miR-467c-5p  | 4.53E-06    | 1.475693845 | up |
| mmu-miR-219a-5p  | 0.002324186 | 1.475687248 | up |
| mmu-miR-486a-3p  | 0.000919759 | 1.443274167 | up |
| mmu-miR-152-3p   | 0           | 1.436588049 | up |
| mmu-miR-3081-3p  | 0           | 1.423452668 | up |
| mmu-miR-138-1-3p | 3.77E-05    | 1.421237687 | up |
| mmu-miR-130a-5p  | 0.003455616 | 1.421237687 | up |
| mmu-miR-34a-5p   | 0           | 1.400100971 | up |
| mmu-miR-193a-3p  | 0.002075034 | 1.35307392  | up |
| mmu-miR-322-5p   | 0           | 1.343370137 | up |
| mmu-miR-32-5p    | 0           | 1.340906224 | up |
| mmu-miR-486a-5p  | 0           | 1.312775207 | up |
| mmu-miR-760-3p   | 0.003023566 | 1.305766865 | up |
| mmu-miR-1839-3p  | 0.004019152 | 1.305763896 | up |
| mmu-miR-133a-3p  | 0           | 1.305752144 | up |

---

|                          |             |              |      |
|--------------------------|-------------|--------------|------|
| mmu-let-7i-3p            | 0           | 1.300517536  | up   |
| mmu-miR-29c-3p           | 0           | 1.297247282  | up   |
| mmu-miR-935              | 0           | 1.277180523  | up   |
| mmu-miR-32-3p            | 0.003227338 | 1.259964516  | up   |
| mmu-miR-138-5p           | 0           | 1.253859223  | up   |
| mmu-miR-139-5p           | 0           | 1.249704808  | up   |
| mmu-miR-669a-5p          | 0           | 1.249173456  | up   |
| mmu-miR-669p-5p          | 0           | 1.249173456  | up   |
| mmu-miR-17-5p            | 0           | 1.237681362  | up   |
| mmu-miR-134-5p           | 0           | 1.224144073  | up   |
| mmu-miR-379-5p           | 0           | 1.223105345  | up   |
| mmu-miR-204-5p           | 0           | 1.216971976  | up   |
| mmu-miR-30e-5p           | 0           | 1.212969701  | up   |
| mmu-miR-28a-5p           | 0           | 1.171972333  | up   |
| mmu-miR-503-5p           | 0           | 1.171938245  | up   |
| mmu-miR-700-3p           | 0           | 1.168250363  | up   |
| mmu-miR-149-5p           | 0           | 1.161365584  | up   |
| mmu-miR-1191a            | 1.72E-05    | 1.161359153  | up   |
| mmu-miR-142a-3p          | 0           | 1.161253439  | up   |
| mmu-miR-140-5p           | 0           | 1.154452131  | up   |
| mmu-miR-130a-3p          | 0           | 1.152400999  | up   |
| mmu-miR-3473e            | 0.003783733 | 1.145307083  | up   |
| mmu-miR-206-3p           | 8.86E-06    | 1.133983355  | up   |
| unconservative_8_723625  | 0.002248932 | 1.13173107   | up   |
| mmu-miR-411-5p           | 0           | 1.129375066  | up   |
| mmu-miR-20a-5p           | 0           | 1.121571328  | up   |
| mmu-miR-151-3p           | 0           | 1.118327543  | up   |
| mmu-miR-582-5p           | 1.31E-05    | 1.113102762  | up   |
| unconservative_12_147376 | 4.53E-06    | 1.094250935  | up   |
| unconservative_7_691663  | 4.53E-06    | 1.094250935  | up   |
| mmu-miR-155-5p           | 0           | 1.091401416  | up   |
| mmu-miR-218-5p           | 0           | 1.080196225  | up   |
| mmu-miR-24-3p            | 0           | 1.037565791  | up   |
| mmu-miR-126a-3p          | 0           | 1.029616621  | up   |
| mmu-miR-335-5p           | 0           | 1.028221645  | up   |
| unconservative_12_178860 | 4.53E-06    | 1.024854959  | up   |
| mmu-miR-345-3p           | 0           | 1.020915666  | up   |
| mmu-miR-142a-5p          | 0           | 1.018727464  | up   |
| mmu-miR-196a-5p          | 0           | 1.016248466  | up   |
| mmu-miR-193a-5p          | 0.007548246 | 1.000917173  | up   |
| mmu-miR-221-5p           | 0           | -1.004027716 | down |
| mmu-miR-340-3p           | 0           | -1.071765263 | down |
| mmu-miR-450a-1-3p        | 0.003815897 | -1.078906455 | down |
| mmu-miR-1843a-3p         | 0.005715265 | -1.086566309 | down |

---

|                 |             |              |      |
|-----------------|-------------|--------------|------|
| mmu-miR-598-3p  | 0           | -1.098875255 | down |
| mmu-miR-224-5p  | 0.000848097 | -1.159898119 | down |
| mmu-miR-130b-5p | 0.000430732 | -1.170695871 | down |
| mmu-let-7a-1-3p | 0           | -1.20373481  | down |
| mmu-let-7c-2-3p | 0           | -1.20373481  | down |
| mmu-let-7j      | 0           | -1.243803652 | down |
| mmu-miR-541-5p  | 0           | -1.261488484 | down |
| mmu-miR-1964-3p | 5.39E-05    | -1.320441804 | down |
| mmu-let-7g-5p   | 0           | -1.385503098 | down |
| mmu-miR-212-5p  | 0           | -1.458429023 | down |
| mmu-let-7f-5p   | 0           | -1.498827373 | down |
| mmu-let-7c-1-3p | 0           | -1.544104663 | down |
| mmu-miR-543-3p  | 0.002867628 | -1.809668788 | down |
| mmu-miR-6516-5p | 0.002765933 | -1.957225976 | down |
| mmu-let-7a-5p   | 0           | -1.989481256 | down |
| mmu-let-7d-5p   | 0           | -2.218560066 | down |

---



Table S5 The Opposite Expression Patterns of DEGs and DEmiRNAs

| Regulation of DEmiRNAs | miRNA           | Target Gene | Regulation of DEGs |
|------------------------|-----------------|-------------|--------------------|
| up                     | mmu-miR-124-3p  | Smpd3       | down               |
| up                     | mmu-miR-124-3p  | Bsn         | down               |
| up                     | mmu-miR-124-3p  | Slc24a2     | down               |
| up                     | mmu-miR-124-3p  | En2         | down               |
| up                     | mmu-miR-124-3p  | Gjb4        | down               |
| up                     | mmu-miR-124-3p  | Fam160a1    | down               |
| up                     | mmu-miR-124-3p  | Foxo6       | down               |
| up                     | mmu-miR-124-3p  | Capn6       | down               |
| up                     | mmu-miR-155-5p  | Otog        | down               |
| up                     | mmu-miR-155-5p  | Vnn3        | down               |
| up                     | mmu-miR-155-5p  | Smpd3       | down               |
| up                     | mmu-miR-155-5p  | Bsn         | down               |
| up                     | mmu-miR-155-5p  | Mag         | down               |
| up                     | mmu-miR-155-5p  | Gjb4        | down               |
| up                     | mmu-miR-155-5p  | Fam160a1    | down               |
| up                     | mmu-miR-155-5p  | Foxo6       | down               |
| up                     | mmu-miR-16-5p   | Smpd3       | down               |
| up                     | mmu-miR-16-5p   | Bsn         | down               |
| up                     | mmu-miR-16-5p   | En2         | down               |
| up                     | mmu-miR-223-3p  | Bsn         | down               |
| up                     | mmu-miR-223-3p  | Mag         | down               |
| down                   | mmu-let-7g-5p   | Hist2h2aa2  | up                 |
| up                     | mmu-miR-133a-3p | Otog        | down               |
| up                     | mmu-miR-133b-3p | Otog        | down               |
| up                     | mmu-miR-138-5p  | Smpd3       | down               |
| up                     | mmu-miR-138-5p  | Bsn         | down               |
| up                     | mmu-miR-153-3p  | Bsn         | down               |
| up                     | mmu-miR-153-3p  | En2         | down               |
| up                     | mmu-miR-188-5p  | Capn6       | down               |
| up                     | mmu-miR-193b-3p | Bsn         | down               |
| up                     | mmu-miR-193b-3p | Slc24a2     | down               |
| up                     | mmu-miR-19b-3p  | Slc24a2     | down               |
| up                     | mmu-miR-19b-3p  | Fam160a1    | down               |
| up                     | mmu-miR-31-5p   | Fam160a1    | down               |
| up                     | mmu-miR-322-5p  | Otog        | down               |
| up                     | mmu-miR-322-5p  | Vnn3        | down               |
| up                     | mmu-miR-466i-3p | Otog        | down               |
| up                     | mmu-miR-466i-3p | Bsn         | down               |
| up                     | mmu-miR-708-5p  | Bsn         | down               |
| up                     | mmu-miR-708-5p  | En2         | down               |
| up                     | mmu-miR-101b-3p | Bsn         | down               |
| up                     | mmu-miR-17-5p   | Slc24a2     | down               |

---

|    |                 |          |      |
|----|-----------------|----------|------|
| up | mmu-miR-206-3p  | Bsn      | down |
| up | mmu-miR-218-5p  | Bsn      | down |
| up | mmu-miR-24-3p   | Bsn      | down |
| up | mmu-miR-28a-5p  | Fam160a1 | down |
| up | mmu-miR-297b-3p | Bsn      | down |
| up | mmu-miR-29a-5p  | Capn6    | down |
| up | mmu-miR-29b-3p  | Capn6    | down |
| up | mmu-miR-30e-5p  | En2      | down |
| up | mmu-miR-31-3p   | Bsn      | down |
| up | mmu-miR-324-3p  | Slc24a2  | down |
| up | mmu-miR-342-3p  | Bsn      | down |
| up | mmu-miR-374b-5p | En2      | down |
| up | mmu-miR-378a-5p | Capn6    | down |
| up | mmu-miR-425-5p  | Slc24a2  | down |
| up | mmu-miR-466a-3p | Bsn      | down |
| up | mmu-miR-466b-3p | Bsn      | down |
| up | mmu-miR-466c-3p | Bsn      | down |
| up | mmu-miR-466d-3p | Bsn      | down |
| up | mmu-miR-466e-3p | Bsn      | down |
| up | mmu-miR-466p-3p | Bsn      | down |
| up | mmu-miR-466q    | Fam160a1 | down |
| up | mmu-miR-467c-5p | Smpd3    | down |
| up | mmu-miR-486a-5p | Otog     | down |
| up | mmu-miR-500-3p  | Foxo6    | down |
| up | mmu-miR-532-3p  | Capn6    | down |

---

Table S6 mirVana mimics & inhibitors of mmu-miR-31-5p

| mirVana mimics & inhibitors              | Cat# (Thermo Fisher) |
|------------------------------------------|----------------------|
| mirVana miRNA mimics                     | 4464066              |
| mirVana miRNA mimics Negative Control    | 4464058              |
| mirVana miRNA inhibitor                  | 4464084              |
| mirVana miRNA inhibitor Negative Control | 000460               |

Table S7 Specific Forward and Reverse Oligonucleotide Primers of NSCs and MNs Related Genes Used for q-PCR

| Gene   |                | Primer                  |
|--------|----------------|-------------------------|
| Nestin | Forward Primer | CCCTGAAGTCGAGGAGCTG     |
|        | Reverse Primer | CTGCTGCACCTCTAAGCGA     |
| ChAT   | Forward Primer | CCATTGTGAAGCGGTTTGGG    |
|        | Reverse Primer | GCCAGGCGGTTGTTTAGATACA  |
| Hb9    | Forward Primer | GAACACCAGTTCAAGCTCAACA  |
|        | Reverse Primer | GCTGCGTTTCCATTTTCATTCG  |
| Nkx6.1 | Forward Primer | CTGCACAGTATGGCCGAGATG   |
|        | Reverse Primer | CCGGGTTATGTGAGCCCAA     |
| Nkx6.2 | Forward Primer | GCATGACCGAGAGCCAAGT     |
|        | Reverse Primer | GCATCCGAGTCTTGCTTCTTTTT |
| Isl1   | Forward Primer | ATGATGGTGGTTTACAGGCTAAC |
|        | Reverse Primer | TCGATGCTACTTCACTGCCAG   |
| Lhx3   | Forward Primer | AGGCGGACTACGAAACAGC     |
|        | Reverse Primer | CGAAGTGTTGTAGGCGCTCT    |
| Olig2  | Forward Primer | TCCCCAGAACCCGATGATCTT   |
|        | Reverse Primer | CGTGGACGAGGACACAGTC     |
| Actb   | Forward Primer | GGCTGTATTCCCCTCCATCG    |
|        | Reverse Primer | CCAGTTGGTAACAATGCCATGT  |
